# Supplementary material
Source: publisher figshare collection journal article supplement (https://gsapubs.figshare.com/ndownloader/files/23210672)
Supplement: Supplementary file 1 [file 23210672]

## Sheet: Miocene adakitic rocks
Type	Himalayan Miocene Adakitic Rocks
Name and references	Mayum Pluton, this study										Songtuoga intrusion/Mayum Pluton, Jiang et al., 2006, Hu et al., 2006								Kuday Dyke, King et al., 2007									Yardoi Miocene two-mica granite, Zeng et al., 2011b, 2012, 2019							Langkazi Enclaves, Zheng et al., 2016						Lasa Pluton, Li et al., 2017
Sample	17ZB-45	17ZB-46	17ZB-47	17ZB-48	17ZB-49	18ZB-3	18ZB-4	18ZB-5	18ZB-6	18ZB-7	M04-1	M04-2	M04-3	M04-4	M04-5	M04-6	M19	M20	JK3/15	JK3/17	TO3/14i	SD52	SD51	JK3/16	T108	SD50	T109	T0394-11	T0394-13	T0394-14	T0394-16	T0394-17	T0394-18	T0394-19	LKZ-12	LKZ-15-1	LKZ-15-2	LKZ-16	LKZ-17	LKZ-19	CBH1	CBH2	CBH3	CBH4	CBH5	CBH6	CBH7	CBH8	CBH9
Age	Zircon U-Pb Age=16.67 ± 0.14 & 16.68 ± 0.16 Ma										Biotite Ar-Ar 17.68 ± 0.15 Ma (Jiang et al., 2006), Zircon U-Pb 18.4 ± 1.3 Ma (Hu et al., 2006), biotite Ar-Ar from 25.23 Ma to 34.16 ± 0.16 Ma (Wen et al., 2004), biotite Ar-Ar plateau age of 19.67 ± 0.52 Ma and 15.66 ± 0.31 Ma with corresponding isochronal age of 19.84 ± 0.40 and 14.29 ± 0.49 Ma (Wen et al., 2007)								Zircon U-Th-Pb & Biotite Ar-Ar give the range from 12.22 ± 0.84 Ma to 9.13 ± 0.58 Ma									ca. 17.7 - ca. 20.0 Ma							Biotite Ar-Ar 10.81±0.86-11.08±0.16 Ma, Zircon U-Pb 12.2±0.4 Ma						Zircon U-Pb Age = 16.52 ± 0.72 & 16.61 ± 0.23 Ma
SiO2	66.74	66.65	66.72	66.76	67.31	66.9	66.22	66.02	66.99	65.79	66.62	66.21	66.13	65.18	64.99	65.74	63.5	65.54	61.01	61.21	63.68	63.71	65.1	67.11	67.56	71.29	72.62	72.01	75.32	72.68	72.48	72.44	72.64	72.26	65.26	65.68	66.83	63.11	64.26	62.19	66.26	67.07	67.61	67.56	66.44	65.44	65.14	65.54	66.98
TiO2	0.59	0.6	0.61	0.62	0.6	0.59	0.6	0.61	0.6	0.61	0.62	0.6	0.59	0.58	0.6	0.58	0.65	0.61	0.83	0.84	0.81	0.63	0.66	0.48	0.62	0.22	0.21	0.2	0.09	0.17	0.23	0.22	0.22	0.23	0.61	0.61	0.55	0.67	0.58	0.83	0.51	0.59	0.53	0.46	0.61	0.6	0.62	0.59	0.57
Al2O3	15.28	15.87	15.47	15.34	15.43	15.66	15.6	16	15.58	15.34	15.54	15.51	15.36	15.72	15.31	15.05	15.69	15.14	18.1	18.27	17.96	16.16	17.45	16.96	17.29	15.96	16.04	16.33	15.14	15.16	15.67	15.83	15.72	15.93	17.4	17.02	16.9	15.07	17.1	17.4	15.42	16.05	15.97	15.53	15.92	15.87	15.68	15.99	15.75
TFe2O3	3.5	3.52	3.53	3.58	3.55	3.49	3.48	3.56	3.52	3.58									4.7	4.76	3.16	2.4	2.99	2.48	0.45	1.37	0.04	1.25	0.59	1.16	1.3	1.33	1.26	1.36	0.98	0.97	0.43	1.03	0.72	1.35	3.05	3.5	2.87	2.87	3.66	3.56	3.86	3.53	3.38
MnO	0.05	0.05	0.05	0.05	0.06	0.05	0.06	0.06	0.06	0.06	0.06	0.05	0.06	0.06	0.06	0.06	0.06	0.06	0.07	0.07	0.04	0.04	0.05	0.04	0.05	0.02	0.02	0.02	0.01	0.02	0.03	0.03	0.03	0.03	0.08	0.07	0.06	0.08	0.07	0.1	0.04	0.06	0.03	0.04	0.06	0.05	0.06	0.05	0.05
MgO	1.77	1.79	1.8	1.8	1.84	1.79	1.81	1.81	1.83	1.89	1.9	1.82	2.34	1.97	1.97	2.01	2.22	1.98	1.7	1.7	1.1	0.9	1	0.9	1	0.5	0.6	0.51	0.25	0.5	0.57	0.56	0.55	0.58	1.69	1.69	1.56	4.26	1.76	2.2	1.56	1.8	1.39	1.51	1.95	1.9	1.98	1.84	1.8
CaO	2.99	3	2.91	2.98	2.93	2.88	3.03	3.06	3.19	3.56	3.42	3.58	3.59	4.06	4.27	3.69	3.96	3.64	4.84	4.58	2.57	4.01	4.28	2.54	3.96	1.71	1.73	1.75	1.39	0.1	1.72	1.65	1.69	1.64	3.68	3.62	3.61	4.11	2.55	3.53	2.92	1.48	2.69	2.44	2.52	3.13	2.86	2.29	2.7
Na2O	3.76	3.85	3.88	3.85	3.87	3.98	3.9	4.04	3.95	3.89	3.66	3.39	2.6	2.97	2.58	2.55	3.77	3.3	4.01	4.22	4.36	4.67	4.66	4.59	4.07	5.21	4.76	4.9	5.51	4.23	4.59	4.55	4.53	4.4	4.15	4.11	4.18	2.23	3.63	4.14	4	4.09	4.15	3.99	4.07	3.98	3.85	4.33	3.96
K2O	3.57	3.5	3.62	3.65	3.51	3.65	3.59	3.42	3.66	3.65	3.64	3.54	3.64	3.56	3.56	3.9	3.15	3.48	3.02	1.96	4.02	1.82	1.61	3.11	0.95	2.67	2.12	1.69	1.23	3.55	1.66	1.7	1.7	1.8	2.05	2.02	1.85	2.96	4.5	2.77	3.27	3.26	3.42	3.54	3.18	3.16	3.13	3	3.31
P2O5	0.22	0.22	0.22	0.22	0.22	0.22	0.23	0.24	0.21	0.22	0.23	0.22	0.23	0.22	0.22	0.22	0.24	0.22	0.33	0.32	0.22	0.23	0.24	0.17	0.24	0.11	0.02	0.06	0.06	0.11	0.08	0.07	0.07	0.08	0.2	0.16	0.16	0.43	0.21	0.31	0.21	0.24	0.22	0.2	0.26	0.25	0.25	0.24	0.23
LOI	0.62	0.68	0.81	0.68	0.75	0.54	0.69	0.62	0.55	0.83	1.17	1.67	2.45	2.58	2.73	2.58	2.26	1.66	1.1	1.03	1.36	4.73	1.22	1.53	1.11	0.71	0.86	1.81	1.01	1.32	2.13	1.91	1.92	1.8	0.17	0.35	0.17	0.52	0.09	0.17	2.76	1.86	1.1	1.85	1.32	2.03	2.56	2.58	1.27
SUM	99.1	99.73	99.61	99.53	100.06	99.75	99.2	99.45	100.14	99.42	100.46	99.93	100.35	100.23	99.64	99.69	99.7	99.87	99.73	98.98	99.29	99.26	99.23	99.94	99.6	99.74	99.79	100.53	100.6	99	100.46	100.29	100.33	100.11							99.99	99.99	99.99	100	99.98	99.98	99.98	99.98	99.99
Mg#	54.08	54.19	54.27	53.97	54.64	54.5	54.88	54.28	54.71	55.15	52	51	57	53	53	54	49	49										42.7	43.9	44.4	44.6	43.7	44.5	44.5							54.4	54.5	53	55	55.4	55.4	54.4	54.9	55.4
A/CNK	0.986927	1.01908	0.992402	0.977144	0.996171	0.995496	0.986904	1.00579	0.958425	0.912069	0.96	0.97	1.05	0.97	0.96	1	0.93	0.95										1.24	1.17	1.19	1.28	1.25	1.27	1.3	1.11	1.1	1.09	1.05	1.1	1.07	1	1.24	1.03	1.05	1.08	1.01	1.05	1.1	1.05
Li	36.46	36.2	33.5	38.7	35.95	42.53	47.19	42.22	44.81	47.26																									153	181	145	174	179	228
Be	3.29	3.5	3.43	3.55	3.44	3.75	3.68	3.79	3.78	3.63																		3.72	4.88	5.64	4.25	3.99	3.92	4.14
Sc	6.6	6.5	6.31	6.61	6.48	6.32	6.46	6.17	6.3	6.37	5.88	5.74	4.6	5.32	4.59	4.49	6.26	5.97										2.28	1.22	1.55	2.08	1.88	3.69	2.69	8.37	8.12	7.13	12.1	8.24	10.75	5.94	6.96	4.78	5.4	7	7.51	7.91	6.36	7.13
V	66.21	66.35	66.21	68.77	65.38	65.19	69.54	67.35	68.29	70.61																		26.1	6.59	14.2	27	26.2	26.1	25.1	88.4	85.5	71.1	99.1	83	114	73.05	82.33	65.97	64.25	88.54	91.86	95.14	83.48	82.71
Cr	33.03	62.81	64.26	90.3	56.6	26.55	25.16	25.78	25.01	27.78	21.4	22.5	16.1	18.5	13.7	16.4	19.6	15.4										13.7	5.14	9.39	16.1	17.2	14.5	15.6	20.2	19.9	16	159	16.5	19	26.59	23.82	18.63	28.68	27.64	27.36	25.29	23.66	32.44
Co	9.27	9.27	9.37	9.68	9.04	9.34	9.6	9.24	9.57	9.79	8.95	8.52	8.23	9.03	9.02	9.13	10	9.38										2.38	0.87	1.76	2.57	2.53	2.54	2.51	10.85	10.4	9.83	19.4	10.8	14.9	7.66	10.64	7.08	6.97	10.29	10.25	10.69	9.45	9.97
Ni	15.79	16.68	16.98	17.4	17.25	16.12	17.83	16.42	16.58	17.04	14.4	13.7	13.4	14.1	14.3	14.2	17	14.4										6.76	3.5	6.48	8.79	7.58	7.59	7.41	19.55	18.8	16.4	102	16.7	24	13.83	16.45	11.94	13.9	18.15	17.74	19.37	17.73	19.03
Cu	6.99	9.77	8.46	7.52	4.17	8.61	12.82	10.62	27.04	17.76	21.4	16.5	14.5	13	16.4	13.4												3.24	2.16	2.68	3.74	3.19	3.35	3.53
Zn	57.23	60.02	61.28	60.73	60.98	53.49	62.83	51.35	60.15	60.24	64.8	62.3	60.3	62.2	64.6	63.8												46.4	25.9	126	46.7	50.1	52.2	56.6
Ga	20.87	21.35	21.02	21.42	20.74	21.79	22.05	22.26	21.77	21.58	21.6	21.2	21.5	21.6	21.1	21.1												19.8	19.5	23.9	21.7	22.6	22.9	23.6							22.64	22.97	21.37	21.57	23.4	23.04	22.53	23.41	23.62
Rb	148.27	150.35	144.38	153.37	146.64	157.24	148.68	148.73	162.49	158.94	138	141	137	138	116	119	137	144	84	74	133	56	75	97	59	93	40	77.72	52	193	81	85	79	91	185.5	210	199	317	315	296.5	100.9	106.2	96.37	118.3	91.21	97.9	94.12	90.03	98.39
Sr	719.75	736.21	729.24	739.66	719.08	784.8	783.18	821.55	785.11	759.99	709	723	667	782	707	636	638	638	1595	1572	1269	769	1672	885	1458	676	366	550.3	470	372	501	536	516	525	678.727	737.273	709.091	840	591.818	774.818	876.6	1040	964.5	809.7	949.5	1003	857.4	894	916.2
Y	12.65	12.28	12.04	12.8	12.01	13.03	13.21	12.54	13	13.54	12.8	11.3	12.8	11.3	12.1	13.5	11.5	10.7	13	12	10	6	9	7	9	7	6	4.61	2.17	5.18	5.79	4.48	5.26	4.94	16.35	14.7	14.6	20.2	19.2	20.95	10.59	10.55	10.8	9.24	11.29	10.92	13.14	10.51	10.86
Zr	127.49	138.86	141.54	137.14	109.81	142.55	137.17	149.22	138.29	148.24	153	141	134	136	129	153	145	141	158	154	204	131	156	137	125	100	90	87.6	37.1	52.4	78.5	77.1	72.6	87.5	113	110	135	231	121	108.5	176.3	184.7	174.8	163.7	182.1	170.9	188.6	180.8	181.3
Nb	9.3	9.35	9.22	9.4	8.89	9.29	9.36	8.83	9.46	9.43	9.36	9.02	8.56	9.28	8.67	8.87	10	10.5	7	8	9	4	6	4	5	2	3	3.18	1.69	3.14	4.05	3.6	3.85	3.76	11.55	11.4	12.1	12.4	9.81	14.45	6.4	6.12	6.52	6.05	6.87	6.44	7.15	6.67	6.6
Sn	2.61	2.68	2.63	2.78	2.57	2.72	2.65	2.61	2.6	2.47																		1.97	1.66	3.72	1.93	1.94	1.96	1.96
Cs	7.77	7.92	7.51	8.18	7.16	8.53	6.12	8.91	6.63	7.08																		7.47	2.11	13.2	6.96	5.14	5.24	7.24	12.05	12.4	11	35	27.2	30.8
Ba	903.54	906.35	891.28	912.67	860.94	905.97	920.42	891.37	927.64	932.78	795	788	823	800	813	866	799	860	1184	1230	1434	984	1662	703	1494	479	476	242	111	530	244	262	287	294	373.182	380	380	1279.09	1090	366.727	1034	1042	1002	1060	1072	1062	949.4	973.1	1026
La	36.89	37.41	35.62	37.98	35.54	33.65	34.48	43.27	33.43	34.21	36.8	35.5	36.3	34.8	37.3	38.5	32.7	32.2	49.6	49.77	74.05		56.15	22.78	43.87	15	10.67	11.1	4.78	13.4	9.73	9.09	13.6	13.8	29.75	26.9	29.8	87	26.4	24.45	30.36	29.8	30.32	22.28	30.62	28.63	31.25	29.35	30.37
Ce	71.29	71.51	68.1	72.51	67.3	68.96	68.39	84.24	69.29	69.44	71.7	68.4	72.6	67.5	72.6	74.3	64.4	64.3	97.99	97.15	138.12		106.63	46.37	90.59	29.5	23.01	23.5	9.79	28.1	19.9	18	28	28.8	59.8	54.3	60.5	172	53.2	50.7	59.93	63.6	62.4	49.42	59.36	63.09	64.76	56.4	60.82
Pr	8.27	8.3	7.76	8.3	7.77	7.8	8.11	9.32	8.05	8.08	8.49	8	8.67	7.92	8.56	8.72	7.51	7.59	12.15	12.02	15.61		12.64	5.54	9.31	3.7	2.54	2.88	1.21	3.29	2.34	2.19	3.27	3.36	6.98	6.49	7	19.6	6.23	6.165	7.22	7.68	7.73	6.21	7.74	7.46	8.09	7.09	7.51
Nd	31.19	31.37	29.69	31.62	29.9	29.45	30.72	33.23	30.42	30.51	31.2	29.7	33.1	29.4	31.9	32.1	28.5	28.6	45.51	44.33	52.58		44.77	20.55	35.72	13.98	10.12	11	4.51	13	9.23	8.42	12.6	12.6	26.85	25.1	27	73.2	24.1	24.9	27.75	30.38	30.41	23.9	31.79	30.49	33.15	28.86	30.36
Sm	5.41	5.4	5.1	5.48	5.11	5.04	5.53	5.53	5.54	5.37	5.61	5.3	5.86	5.24	5.71	5.84	5.11	5.06	7.78	7.61	7.78		7.11	3.82	5.7	2.89	2.18	2.12	1.19	3.06	2.09	1.8	2.68	2.83	5.63	5.28	5.44	12.2	5.21	6.33	4.74	4.96	4.7	4.22	5.04	4.96	5.39	4.69	4.81
Eu	1.2	1.2	1.16	1.14	1.09	1.17	1.23	1.3	1.26	1.23	1.27	1.25	1.33	1.23	1.25	1.31	1.34	1.28	1.79	1.73	1.69		1.52	0.85	1.18	0.7	0.53	0.73	0.44	0.56	0.73	0.63	0.69	0.72	0.885	0.86	0.99	2.24	0.84	0.67	1.19	1.25	1.22	1.14	1.32	1.4	1.33	1.3	1.3
Gd	3.8	3.65	3.6	3.76	3.73	3.61	3.76	3.93	3.83	3.87	3.89	3.75	4.23	3.7	4.03	4.15	3.44	3.37	4.8	4.65	4.43		3.93	2.59	3.44	2.11	1.77	1.71	1	2.61	1.77	1.55	2.05	2.16	4.905	4.32	4.41	7.98	4.85	6.045	3.11	3.42	3.3	2.96	3.46	3.2	3.7	3.22	3.35
Tb	0.49	0.5	0.48	0.51	0.48	0.48	0.5	0.47	0.49	0.48	0.56	0.51	0.58	0.52	0.52	0.57	0.49	0.46	0.56	0.55	0.51		0.42	0.33	0.36	0.26	0.25	0.2	0.13	0.29	0.23	0.2	0.25	0.25	0.655	0.59	0.6	0.9	0.67	0.87	0.36	0.38	0.37	0.34	0.4	0.37	0.43	0.37	0.39
Dy	2.56	2.5	2.4	2.55	2.38	2.5	2.59	2.48	2.62	2.61	2.57	2.46	2.78	2.38	2.64	2.85	2.5	2.37	2.58	2.51	2.27		1.84	1.54	1.62	1.15	1.24	1.02	0.54	1.17	1.06	0.94	1.1	1.1	3.445	3.02	3.07	4.27	3.77	4.5	1.97	2.13	2.16	1.96	2.25	2.02	2.64	2.1	2.28
Ho	0.44	0.43	0.43	0.45	0.41	0.42	0.43	0.42	0.45	0.46	0.49	0.43	0.48	0.43	0.46	0.51	0.46	0.43	0.45	0.43	0.4		0.3	0.26	0.28	0.19	0.22	0.18	0.08	0.18	0.2	0.15	0.17	0.17	0.575	0.53	0.52	0.73	0.65	0.74	0.4	0.41	0.4	0.36	0.42	0.37	0.52	0.39	0.42
Er	1.18	1.19	1.16	1.24	1.13	1.15	1.21	1.16	1.25	1.26	1.28	1.18	1.28	1.19	1.25	1.35	1.25	1.17	1.12	1.04	0.99		0.73	0.64	0.7	0.46	0.53	0.52	0.2	0.44	0.56	0.42	0.49	0.47	1.53	1.36	1.35	2.1	1.8	1.805	1.1	1.17	1.15	1	1.25	1.11	1.44	1.15	1.24
Tm	0.17	0.16	0.16	0.16	0.17	0.19	0.16	0.16	0.16	0.17	0.18	0.16	0.18	0.16	0.17	0.17	0.17	0.16										0.07	0.03	0.06	0.08	0.06	0.07	0.06	0.19	0.18	0.17	0.26	0.25	0.22	0.15	0.16	0.17	0.15	0.16	0.15	0.2	0.15	0.16
Yb	1.04	1.01	0.99	1.01	1	1.1	1.11	1.07	1.06	1.07	1.09	0.99	1.06	1.07	1.06	1.16	1.04	1.03	0.82	0.74	0.73		0.51	0.47	0.6	0.32	0.42	0.47	0.18	0.38	0.54	0.38	0.36	0.37	1.195	1.14	1.06	1.67	1.43	1.39	0.85	0.88	0.94	0.82	0.93	0.87	1.19	0.89	0.91
Lu	0.16	0.15	0.14	0.16	0.14	0.15	0.17	0.17	0.18	0.17	0.17	0.15	0.16	0.15	0.15	0.17	0.16	0.16	0.11	0.09	0.09		0.06	0.06	0.09	0.04	0.06	0.07	0.03	0.05	0.07	0.06	0.06	0.06	0.15	0.16	0.14	0.23	0.2	0.17	0.14	0.14	0.13	0.14	0.15	0.14	0.18	0.14	0.17
Hf	3.75	4.01	3.92	3.81	3.18	3.8	3.93	4.18	3.87	4.18	5.57	5.07	4.62	4.8	4.6	5.31	4.25	4.08										3.12	1.66	1.92	2.58	2.36	2.29	2.77	3.09	2.81	3.69	5.61	3.16	2.62	4.58	4.73	4.51	4.43	4.82	4.34	4.94	4.73	5.03
Ta	0.9	0.9	0.88	0.9	0.86	0.88	0.94	0.84	0.93	0.9	0.98	0.96	0.91	1.04	0.89	0.9	0.77	0.8	0.51	0.51	0.55		0.39	0.37	0.38	0.25	0.27	0.25	0.17	0.43	0.37	0.29	0.29	0.39	1.1	1.08	1.4	1.01	0.83	1.085	0.51	0.48	0.58	0.54	0.53	0.48	0.54	0.52	0.53
Tl	0.88	0.9	0.87	0.91	0.91	0.83	0.9	0.86	1.06	1																		0.48	0.28	1.34	0.46	0.46	0.47	0.5
Pb	31.94	32.18	32.04	31.76	32.08	26.18	33.57	24.42	33.26	35.6	35.5	30.9	28.2	28.6	28.6	27.9	31.4	33.4										47.1	39	48.8	41.7	38.6	40.1	39.5	42.25	33.1	40.7	11.4	63.3	46.05	25.57	29.42	43.99	26.8	25.56	29.21	24.05	25.39	30.01
Th	14.29	14.28	13.6	14.38	13.19	13.37	11.33	15.51	13.72	13.61	11.8	11.5	11.5	11.9	10.6	10.6	10.9	13.6	15.1	15.9	33.5	27.1	24.2	5.9	20.2	4.2	3.2	4.54	1.97	5.87	4.16	3.88	5.78	5.93	9.01	9.8	9.73	65.3	9.18	8.665	8.4	7.73	6.82	7.52	7.83	7.34	8.48	6.93	7.96
U	3.45	3.38	3.26	3.38	3.2	4.69	3.36	4.82	3.41	3.59	4.03	4.08	4.53	3.82	3.38	3.12	3.75	3.45	4.9	2.6	5.7	6.2	6.2	4.3	5.2	3.9	2.4	1.87	1.11	2.33	1.79	1.88	1.73	2.11	2.42	4.3	3.95	10.9	3.11	2.885	1.99	2.35	1.94	2.15	2.17	2.15	2.02	2.29	2.21
(La/Yb)N	25.36	26.56	25.78	27.02	25.51	21.89	22.32	29.01	22.59	23																		16.61	18.68	24.8	12.67	16.83	26.57	26.23	16.823	15.9453	18.9975	35.2037	12.4754	11.8864	25.5	24.3	23.1	19.4	23.5	23.7	18.8	23.6	24.1
Sr/Y	56.91	59.94	60.54	57.77	59.87	60.22	59.28	65.5	60.41	56.13																		119.4	216.6	71.81	86.53	119.6	98.1	106.3	41.5124	50.1546	48.5679	41.5842	30.8239	36.9842	82.7	98.6	89.3	87.7	84.1	91.9	65.2	85	84.4
Eu/Eu*	0.809123	0.826345	0.827647	0.767793	0.763282	0.838573	0.824655	0.852527	0.836257	0.824871																		1.19	1.25	0.61	1.17	1.17	0.91	0.9	0.5	0.53	0.6	0.65	0.5	0.33	0.89	0.88	0.9	0.94	0.91	0.83	0.75	1.01	0.86
(87Sr/86Sr)i	0.70926	0.70928				0.70933	0.7093				0.709161	0.708911	0.710014	0.708963	0.709481		0.70973		0.7077	0.70784	0.70789	0.70784	0.70714	0.71059	0.70731		0.7076	0.709121	0.709238	0.709699	0.709791	0.709194	0.709451	0.709331	0.709604	0.709234	0.709268	0.713661	0.710361	0.708475			0.70877		0.70805		0.70842		0.70877
143Nd/144Nd(t)	0.51229	0.512291				0.512263	0.512254				0.551242	0.512253	0.512211	0.512321	0.512288		0.512808		0.512425	0.512407	0.512309	0.512313	0.512329	0.512263	0.512405		0.512229								0.512282	0.512291	0.512308	0.512181	0.512249	0.512238			0.512263		0.512289		0.512246		0.512212
εNd(t)	-6.36	-6.36				-6.9	-7.07				-3.97	-7.3	-8.11	-5.96	-6.62		3.53		-4.15	-4.51	-6.42	-6.34	-6.03	-7.32	-4.55		-7.98	-7.7	-7.8	-8.4	-8.4	-8.4	-8.5	-8.4	-6.64074	-6.4658	-6.12582	-8.60954	-7.2906	-7.50195			-6.9		-6.4		-7.2		-7.9
TDM1 Nd (Ma)	1195	1186				1219	1265																																				1114		1101		1181		1200
TDM2 Nd (Ma)	1348	1348				1392	1405				1018	1251	1239	1105	1186		471		909	935	1071	1086	1043	1136	937		1183								1409	1396	1344	1451	1479	1599			1394		1353		1420		1475
TZr	752.749	762.402	761.424	757.151	741.661	762.077	757.604	765.946	755.004	753.834																									753.5	751.2	769.6	808.5	758	743.1
εHf(t)
TDM1 Hf (Ma)
TDM2 Hf (Ma)
[truncated: 79 more columns]
